# Supplementary material
Source: Elsevier journal article supplement (https://www.sciencedirect.com/science/article/pii/S188558572100058X)
Supplement: mmc1 [file S188558572100058X:mmc1.pdf]

[illegible]

*Miró Ò, et al. Impacto de las características estructurales y organizativas hospitalarias y de urgencias en el resultado evolutivo de la insuficiencia cardiaca aguda*

|                                                  |       |       |       |       |       |       |       |
|--------------------------------------------------|-------|-------|-------|-------|-------|-------|-------|
| Servicio de urgencias con alta<br>frecuentación  | 0,379 | 0,321 | 0,646 | 0,738 | 0,705 | 0,603 | 0,925 |
| Servicio de urgencias con área de<br>observación | 0,811 | 0,254 | 0,697 | 0,995 | 0,267 | 0,880 | 0,785 |

Relaciones estadísticamente significativas con  $p < 0,05$ .

*Miró Ò, et al. Impacto de las características estructurales y organizativas hospitalarias y de urgencias en el resultado evolutivo de la insuficiencia cardiaca aguda*

**Tabla 2 del material adicional**

Sucesión de modelos progresivos para la evaluación de los diferentes resultados analizados en los pacientes con insuficiencia cardiaca aguda atendidos en urgencias

|                                                                               | Pacientes en el modelo, n (%) | $\chi^2$ (grados de libertad) del modelo | p       | Hay efecto dependiente del centro (p del centro en el modelo) |
|-------------------------------------------------------------------------------|-------------------------------|------------------------------------------|---------|---------------------------------------------------------------|
| <b>Mortalidad hospitalaria</b>                                                |                               |                                          |         |                                                               |
| <i>Modelo 1: Periodo de inclusión</i>                                         | 17.866 (99,4)                 | 16,1 (5)                                 | 0,007   | -                                                             |
| <i>Modelo 2: Periodo de inclusión + características del paciente</i>          | 17.866 (99,4)                 | 1543 (45)                                | < 0,001 | -                                                             |
| Modelo 2 sin imputación múltiple de valores perdidos                          | 3.427 (19,1)                  | 203,5 (42)                               | < 0,001 | -                                                             |
| <i>Modelo 3: Periodo de inclusión + características del paciente + Centro</i> | 17.866 (99,4)                 | 1613 (82)                                | < 0,001 | Sí (0,002)                                                    |
| Modelo 3 sin imputación múltiple de valores perdidos                          | 3.427 (19,1)                  | 233,3 (78)                               | < 0,001 | No (0,926)                                                    |

*Miró Ò, et al. Impacto de las características estructurales y organizativas hospitalarias y de urgencias en el resultado evolutivo de la insuficiencia cardiaca aguda*

|                                                                               |               |            |         |              |
|-------------------------------------------------------------------------------|---------------|------------|---------|--------------|
| <b>Estancia prolongada</b>                                                    |               |            |         |              |
| <i>Modelo 1: Periodo de inclusión</i>                                         | 17,364 (96,6) | 11,0 (5)   | 0,05    | -            |
| <i>Modelo 2: Periodo de inclusión + características del paciente</i>          | 17,364 (96,6) | 2242 (45)  | < 0,001 | -            |
| Modelo 2 sin imputación múltiple de valores perdidos                          | 3.407 (19,0)  | 530,7 (42) | < 0,001 | -            |
| <i>Modelo 3: Periodo de inclusión + características del paciente + centro</i> | 17,364 (96,6) | 2.792 (82) | < 0,001 | Sí (< 0,001) |
| Modelo 3 sin imputación múltiple de valores perdidos                          | 3.407 (19,0)  | 695,2 (78) | < 0,001 | Sí (<0,001)  |
| <b>Mortalidad a 30 días</b>                                                   |               |            |         |              |
| <i>Modelo 1: Periodo de inclusión</i>                                         | 16,769 (93,3) | 92,0 (5)   | < 0,001 | -            |
| <i>Modelo 2: Periodo de inclusión + características del paciente</i>          | 16,769 (93,3) | 1820 (45)  | < 0,001 | -            |
| Modelo 2 sin imputación múltiple de valores perdidos                          | 3.418 (19,0)  | 200,7 (42) | < 0,001 | -            |
| <i>Modelo 3: Periodo de inclusión + características del paciente + centro</i> | 16,769 (93,3) | 1.823 (82) | < 0,001 | Sí (0,006)   |

*Miró Ò, et al. Impacto de las características estructurales y organizativas hospitalarias y de urgencias en el resultado evolutivo de la insuficiencia cardiaca aguda*

|                                                                               |               |            |         |              |
|-------------------------------------------------------------------------------|---------------|------------|---------|--------------|
| Modelo 3 sin imputación múltiple de valores perdidos                          | 3.418 (19,0)  | 253,2 (78) | <0,001  | No (0,497)   |
| <b>Reconsulta a urgencias a los 7 días del alta</b>                           |               |            |         |              |
| <i>Modelo 1: Periodo de inclusión</i>                                         | 14.876 (82,8) | 9,3 (4)    | 0,06    | -            |
| <i>Modelo 2: Periodo de inclusión + características del paciente</i>          | 14.876 (82,8) | 194,6 (44) | < 0,001 | -            |
| Modelo 2 sin imputación múltiple de valores perdidos                          | 3.290 (18,3)  | 86,4 (42)  | < 0,001 | -            |
| <i>Modelo 3: Periodo de inclusión + características del paciente + centro</i> | 14.876 (82,8) | 294,3 (82) | < 0,001 | Sí (< 0,001) |
| Modelo 3 sin imputación múltiple de valores perdidos                          | 3.290 (18,3)  | 127,6 (78) | < 0,001 | No (0,966)   |
| <b>Reconsulta a urgencias a los 30 días del alta</b>                          |               |            |         |              |
| <i>Modelo 1: Periodo de inclusión</i>                                         | 12,980 (72,2) | 22,7 (4)   | < 0,001 | -            |
| <i>Modelo 2: Periodo de inclusión + características del paciente</i>          | 12,980 (72,2) | 353,7 (44) | < 0,001 | -            |

*Miró Ò, et al. Impacto de las características estructurales y organizativas hospitalarias y de urgencias en el resultado evolutivo de la insuficiencia cardiaca aguda*

|                                                                               |               |            |         |              |
|-------------------------------------------------------------------------------|---------------|------------|---------|--------------|
| Modelo 2 sin imputación múltiple de valores perdidos                          | 2.976 (16,6)  | 88,3 (42)  | < 0,001 | -            |
| <i>Modelo 3: Periodo de inclusión + características del paciente + centro</i> | 12,980 (72,2) | 536,9 (82) | < 0,001 | Sí (< 0,001) |
| Modelo 3 sin imputación múltiple de valores perdidos                          | 2.976 (16,6)  | 129,5 (78) | < 0,001 | No (0,324)   |
| <b>Hospitalización a los 30 días del alta</b>                                 |               |            |         |              |
| <i>Modelo 1: Periodo de inclusión</i>                                         | 8.756 (48,7)  | 8,08 (2)   | 0,02    | -            |
| <i>Modelo 2: Periodo de inclusión + características del paciente</i>          | 8.756 (48,7)  | 298,1 (42) | < 0,001 | -            |
| Modelo 2 sin imputación múltiple de valores perdidos                          | 2,673 (14,9)  | 124,9 (42) | < 0,001 | -            |
| <i>Modelo 3: Periodo de inclusión + características del paciente + centro</i> | 8.756 (48,7)  | 402,2 (79) | < 0,001 | Sí (< 0,001) |
| Modelo 3 sin imputación múltiple de valores perdidos                          | 2,673 (14,9)  | 160,6 (78) | < 0,001 | No (0,580)   |
| <b>Muerte a los 30 días del alta</b>                                          |               |            |         |              |
| <i>Modelo 1: Periodo de inclusión</i>                                         | 14.962 (83,2) | 20,7 (5)   | < 0,001 | -            |

Miró Ò, et al. Impacto de las características estructurales y organizativas hospitalarias y de urgencias en el resultado evolutivo de la insuficiencia cardiaca aguda

|                                                                               |               |            |         |              |
|-------------------------------------------------------------------------------|---------------|------------|---------|--------------|
| <i>Modelo 2: Periodo de inclusión + características del paciente</i>          | 14.962 (83,2) | 637,6 (45) | < 0,001 | -            |
| Modelo 2 sin imputación múltiple de valores perdidos                          | 3.306 (18,4)  | 154,7 (42) | < 0,001 | -            |
| <i>Modelo 3: Periodo de inclusión + características del paciente + centro</i> | 14.962 (83,2) | 698,0 (82) | < 0,001 | Sí (< 0,001) |
| Modelo 3 sin imputación múltiple de valores perdidos                          | 3.306 (18,4)  | 204,4 (78) | < 0,001 | No (0,182)   |
| <b>Evento combinado a los 30 días del alta</b>                                |               |            |         |              |
| <i>Modelo 1: Periodo de inclusión</i>                                         | 13,024 (72,5) | 21,2 (4)   | < 0,001 | -            |
| <i>Modelo 2: Periodo de inclusión + características del paciente</i>          | 13,024 (72,5) | 407,1 (41) | < 0,001 | -            |
| Modelo 2 sin imputación múltiple de valores perdidos                          | 2,985 (16,6)  | 115,6 (41) | < 0,001 | -            |
| <i>Modelo 3: Periodo de inclusión + características del paciente + centro</i> | 13,024 (72,5) | 636,0 (82) | < 0,001 | Sí (< 0,001) |
| Modelo 3 sin imputación múltiple de valores perdidos                          | 2,985 (16,6)  | 165,5 (78) | < 0,001 | No (0,136)   |

*Miró Ò, et al. Impacto de las características estructurales y organizativas hospitalarias y de urgencias en el resultado evolutivo de la insuficiencia cardiaca aguda*

## **INVESTIGADORES DEL GRUPO ICA-SEMES**

Marta Fuentes, Cristina Gil (Hospital Universitario de Salamanca), Héctor Alonso, Enrique Pérez-Llantada (Hospital Marqués de Valdecilla de Santander), Francisco Javier Martín-Sánchez, Guillermo Llopis García, Mar Suárez Cadenas (Hospital Clínico San Carlos de Madrid), Òscar Miró, Víctor Gil, Rosa Escoda, Sira Aguiló, Carolina Sánchez (Hospital Clínic de Barcelona), María José Pérez-Durá, Eva Salvo (Hospital Politènic La Fe de Valencia), José Pavón (Hospital Dr. Negrín de Las Palmas de Gran Canaria), Antonio Noval (Hospital Insular de Las Palmas de Gran Canaria), José Manuel Torres (Hospital Reina Sofía de Córdoba), María Luisa López-Grima, Amparo Valero, María Ángeles Juan (Hospital Dr. Peset de Valencia), Alfons Aguirre, Maria Angels Pedragosa, Silvia Mínguez Masó (Hospital del Mar de Barcelona), María Isabel Alonso, Francisco Ruiz (Hospital de Valme de Sevilla), José Miguel Franco (Hospital Miguel Servet de Zaragoza), Ana Belén Mecina (Hospital de Alcorcón de Madrid), Josep Tost, Marta Berenguer, Ruxandra Donea (Consorti Sanitari de Terrassa), Susana Sánchez Ramón, Virginia Carbajosa Rodríguez (Hospital Universitario Río Hortega de Valladolid), Pascual Piñera, José Andrés Sánchez Nicolás (Hospital Reina Sofía de Murcia), Raquel Torres Garate (Hospital Severo Ochoa de Madrid), Aitor Alquézar-Arbé, Miguel Alberto Rizzi, Sergio Herrera (Hospital de la Santa Creu y Sant Pau de Barcelona), Javier Jacob, Alex Roset, Irene Cabello, Antonio Haro (Hospital Universitari de Bellvitge de Barcelona), Fernando Richard, José María Álvarez Pérez, María Pilar López Díez (Hospital Universitario de Burgos), Pablo Herrero Puente, Joaquín Vázquez Álvarez, Belén Prieto García, María García García, Marta Sánchez González (Hospital Universitario Central de Asturias de Oviedo), Pere Llorens, Patricia Javaloyes, Víctor Marquina, Inmaculada Jiménez, Néstor Hernández, Benjamín Brouzet, Begoña Espinosa, Adriana Gil (Hospital General de Alicante), Juan Antonio Andueza (Hospital General Universitario Gregorio Marañón de Madrid), Rodolfo



*Miró Ò, et al. Impacto de las características estructurales y organizativas hospitalarias y de urgencias en el resultado evolutivo de la insuficiencia cardiaca aguda*

Romero (Hospital Universitario de Getafe de Madrid), Martín Ruíz, Roberto Calvache (Hospital de Henares de Madrid), María Teresa Lorca Serralta, Luis Ernesto Calderón Jave (Hospital del Tajo de Madrid), Beatriz Amores Arriaga, Beatriz Sierra Bergua (Hospital Clínico Lozano Blesa de Zaragoza), Enrique Martín Mojarro, Brigitte Silvana Alarcón Jiménez (Hospital Sant Pau i Santa Tecla de Tarragona), Lisette Travería Bécquer, Guillermo Burillo (Hospital Universitario de Canarias de Tenerife), Lluís Llauger García, Gerard Corominas LaSalle (Hospital Universitari de Vic de Barcelona), Carmen Agüera Urbano, Ana Belén García Soto, Elisa Delgado Padial (Hospital Costa del Sol de Marbella de Málaga), Ester Soy Ferrer, María Adroher Muñoz (Hospital Josep Trueta de Girona), José Manuel Garrido (Hospital Virgen Macarena de Sevilla), Francisco Javier Lucas-Imbernón (Hospital General Universitario de Albacete), Rut Gaya (Hospital Juan XXIII de Tarragona), Carlos Bibiano, María Mir, Beatriz Rodríguez (Hospital Infanta Leonor de Madrid), José Luis Carballo (Complejo Hospitalario Universitario de Ourense), Esther Rodríguez-Adrada, Belén Rodríguez Miranda, Monika Vicente Martín (Hospital Rey Juan Carlos de Móstoles de Madrid), Pere Coma Casanova y Joan Espinach Alvarós (Hospital San Joan de Deu de Martorell, Barcelona).
